# Supplementary material for: TGF-β blockade drives a transitional effector phenotype in T cells reversing SIV latency and decreasing SIV reservoirs in vivo
Source: PubMed Central journal article supplement (PMC10867093; doi:10.1038/s41467-024-45555-x), 2024-02-14

## Reporting Summary

Nature Portfolio wishes to improve the reproducibility of the work that we publish. This form provides structure for consistency and transparency in reporting. For further information on Nature Portfolio policies, see our [Editorial Policies](#) and the [Editorial Policy Checklist](#).

Please do not complete any field with "not applicable" or n/a. Refer to the help text for what text to use if an item is not relevant to your study. For final submission: please carefully check your responses for accuracy; you will not be able to make changes later.

### Statistics

For all statistical analyses, confirm that the following items are present in the figure legend, table legend, main text, or Methods section.

n/a Confirmed

- The exact sample size ( $n$ ) for each experimental group/condition, given as a discrete number and unit of measurement
- A statement on whether measurements were taken from distinct samples or whether the same sample was measured repeatedly
- The statistical test(s) used AND whether they are one- or two-sided  
*Only common tests should be described solely by name; describe more complex techniques in the Methods section.*
- A description of all covariates tested
- A description of any assumptions or corrections, such as tests of normality and adjustment for multiple comparisons
- A full description of the statistical parameters including central tendency (e.g. means) or other basic estimates (e.g. regression coefficient) AND variation (e.g. standard deviation) or associated estimates of uncertainty (e.g. confidence intervals)
- For null hypothesis testing, the test statistic (e.g.  $F$ ,  $t$ ,  $r$ ) with confidence intervals, effect sizes, degrees of freedom and  $P$  value noted  
*Give  $P$  values as exact values whenever suitable.*
- For Bayesian analysis, information on the choice of priors and Markov chain Monte Carlo settings
- For hierarchical and complex designs, identification of the appropriate level for tests and full reporting of outcomes
- Estimates of effect sizes (e.g. Cohen's  $d$ , Pearson's  $r$ ), indicating how they were calculated

*Our web collection on [statistics for biologists](#) contains articles on many of the points above.*

### Software and code

Policy information about [availability of computer code](#)

Data collection

Divia v6 software was used for data collection of flow cytometry data. Flowjo v10 was used for flow cytometry analysis. For the high-dimensional data analysis, tSNE and flowSOM plugins in Flowjo v10 were utilized, and figures and statistics were generated in Python. Partek Flow genomic analysis suite, in combination with Parse Bioscience proprietary scripts, was used for scRNAseq analysis.

Data analysis

For bulk RNA-seq analysis, Trimmomatic-0.36 and Hisat2-Stringtie pipeline were employed for primary analysis. Differential expression analysis was conducted using DESeq2 and gene set enrichment analysis was performed using GSEA and Metascape. MIM software was used for PET/CT images analysis.

For manuscripts utilizing custom algorithms or software that are central to the research but not yet described in published literature, software must be made available to editors and reviewers. We strongly encourage code deposition in a community repository (e.g. GitHub). See the Nature Portfolio [guidelines for submitting code & software](#) for further information.

### Data

Policy information about [availability of data](#)

All manuscripts must include a [data availability statement](#). This statement should provide the following information, where applicable:

- Accession codes, unique identifiers, or web links for publicly available datasets
- A description of any restrictions on data availability
- For clinical datasets or third party data, please ensure that the statement adheres to our [policy](#)

All relevant data are included in the manuscript or supplemental material. Raw data files including DICOM image files are available to be shared upon request to the corresponding author [elena.martinelli@northwestern.edu](mailto:elena.martinelli@northwestern.edu). All RNA sequencing data originating from this study have been deposited in NCBI GEO under the accession code: GSE244871

## Research involving human participants, their data, or biological material

Policy information about studies with [human participants or human data](#). See also policy information about [sex, gender \(identity/presentation\), and sexual orientation](#) and [race, ethnicity and racism](#).

|                                                                    |     |
|--------------------------------------------------------------------|-----|
| Reporting on sex and gender                                        | N/A |
| Reporting on race, ethnicity, or other socially relevant groupings | N/A |
| Population characteristics                                         | N/A |
| Recruitment                                                        | N/A |
| Ethics oversight                                                   | N/A |

Note that full information on the approval of the study protocol must also be provided in the manuscript.

## Field-specific reporting

Please select the one below that is the best fit for your research. If you are not sure, read the appropriate sections before making your selection.

Life sciences  Behavioural & social sciences  Ecological, evolutionary & environmental sciences

For a reference copy of the document with all sections, see [nature.com/documents/nr-reporting-summary-flat.pdf](https://www.nature.com/documents/nr-reporting-summary-flat.pdf)

## Life sciences study design

All studies must disclose on these points even when the disclosure is negative.

|                 |                                                                                                                                                                                                                                                                           |
|-----------------|---------------------------------------------------------------------------------------------------------------------------------------------------------------------------------------------------------------------------------------------------------------------------|
| Sample size     | Macaques for research are an extremely valuable resource. Hence, every effort was made to minimize the number of animals used in this study. n=8 for the study group was chosen because considered to have an acceptable 80% power to detect an effect size of $d_z=1.19$ |
| Data exclusions | All data were included in the analysis, but for imaging data of 08M171 in Figure 2 as indicated in the article                                                                                                                                                            |
| Replication     | In addition to the biological replicates every assay was run with 2 or 3 technical replicates. All attempt at replication were successful                                                                                                                                 |
| Randomization   | The study has only 1 group of animals treated with the drug. Analsyis is before vs after                                                                                                                                                                                  |
| Blinding        | The assay performer was blind to the time point (eg before or after drug)                                                                                                                                                                                                 |

## Behavioural & social sciences study design

All studies must disclose on these points even when the disclosure is negative.

|                   |     |
|-------------------|-----|
| Study description | N/A |
| Research sample   | N/A |
| Sampling strategy | N/A |
| Data collection   | N/A |
| Timing            | N/A |
| Data exclusions   | N/A |
| Non-participation | N/A |
| Randomization     | N/A |

# Ecological, evolutionary & environmental sciences study design

All studies must disclose on these points even when the disclosure is negative.

|                          |                      |
|--------------------------|----------------------|
| Study description        | <input type="text"/> |
| Research sample          | <input type="text"/> |
| Sampling strategy        | <input type="text"/> |
| Data collection          | <input type="text"/> |
| Timing and spatial scale | <input type="text"/> |
| Data exclusions          | <input type="text"/> |
| Reproducibility          | <input type="text"/> |
| Randomization            | <input type="text"/> |
| Blinding                 | <input type="text"/> |

Did the study involve field work?  Yes  No

## Field work, collection and transport

|                        |                      |
|------------------------|----------------------|
| Field conditions       | <input type="text"/> |
| Location               | <input type="text"/> |
| Access & import/export | <input type="text"/> |
| Disturbance            | <input type="text"/> |

## Reporting for specific materials, systems and methods

We require information from authors about some types of materials, experimental systems and methods used in many studies. Here, indicate whether each material, system or method listed is relevant to your study. If you are not sure if a list item applies to your research, read the appropriate section before selecting a response.

### Materials & experimental systems

|                                     |                                                                 |
|-------------------------------------|-----------------------------------------------------------------|
| n/a                                 | Included in the study                                           |
| <input type="checkbox"/>            | <input checked="" type="checkbox"/> Antibodies                  |
| <input checked="" type="checkbox"/> | <input type="checkbox"/> Eukaryotic cell lines                  |
| <input checked="" type="checkbox"/> | <input type="checkbox"/> Palaeontology and archaeology          |
| <input type="checkbox"/>            | <input checked="" type="checkbox"/> Animals and other organisms |
| <input checked="" type="checkbox"/> | <input type="checkbox"/> Clinical data                          |
| <input checked="" type="checkbox"/> | <input type="checkbox"/> Dual use research of concern           |
| <input checked="" type="checkbox"/> | <input type="checkbox"/> Plants                                 |

### Methods

|                                     |                                                    |
|-------------------------------------|----------------------------------------------------|
| n/a                                 | Included in the study                              |
| <input checked="" type="checkbox"/> | <input type="checkbox"/> ChIP-seq                  |
| <input type="checkbox"/>            | <input checked="" type="checkbox"/> Flow cytometry |
| <input checked="" type="checkbox"/> | <input type="checkbox"/> MRI-based neuroimaging    |

## Antibodies

|                 |                                                                                                                                                                                                                                                                                                                                                                                                                                                                                                                                                                                                                                                                                                                                                                                                                                                                                                                                                                         |
|-----------------|-------------------------------------------------------------------------------------------------------------------------------------------------------------------------------------------------------------------------------------------------------------------------------------------------------------------------------------------------------------------------------------------------------------------------------------------------------------------------------------------------------------------------------------------------------------------------------------------------------------------------------------------------------------------------------------------------------------------------------------------------------------------------------------------------------------------------------------------------------------------------------------------------------------------------------------------------------------------------|
| Antibodies used | <input type="text" value="BPMC High-Dim&lt;br/&gt;DAPI FVS440UV Live Dead BD&lt;br/&gt;BUV395 CD4 L200 BD&lt;br/&gt;BUV496&lt;br/&gt;BUV563 CD8 RPA-T8 BD&lt;br/&gt;BUV615&lt;br/&gt;BUV661 CCR7 3D12 BD&lt;br/&gt;BUV737 CD16 3G8 BD&lt;br/&gt;BUV805 CD3 SP34-2 BD&lt;br/&gt;BV421 CD73&lt;br/&gt;BV480 Ki67** B56 BD&lt;br/&gt;BV510 CD28 28.2 Biolegend&lt;br/&gt;BV570&lt;br/&gt;BV605 CD69 FN50 Biolegend&lt;br/&gt;BV650 HLA-DR L243 BD&lt;br/&gt;BV711 CD62L SK11 BD&lt;br/&gt;BV750 CD45RA 5H9 BD&lt;br/&gt;BV786 Tbet 4B10 Biolegend&lt;br/&gt;AF488 CCR6 G034E3 Biolegend&lt;br/&gt;BB630 Tim-3 7D3 BD&lt;br/&gt;BB660/PCP&lt;br/&gt;BB700/PCPeFluo710 PD-1 eBioJ105 eBioscience&lt;br/&gt;BB755&lt;br/&gt;BB790 GRZB** GB11 BD&lt;br/&gt;PE TCF-1** S33-966 BD&lt;br/&gt;PE-CF594 CD95 DX2 Biolegend&lt;br/&gt;PE-Vio770 NKG2A REA110 Mylteny&lt;br/&gt;APC a4b7 Act-1 NHP&lt;br/&gt;AF700/R718 CD101 V7.1 BD&lt;br/&gt;APC-Fire750 CD56 HCD56 Biolegend"/> |
|-----------------|-------------------------------------------------------------------------------------------------------------------------------------------------------------------------------------------------------------------------------------------------------------------------------------------------------------------------------------------------------------------------------------------------------------------------------------------------------------------------------------------------------------------------------------------------------------------------------------------------------------------------------------------------------------------------------------------------------------------------------------------------------------------------------------------------------------------------------------------------------------------------------------------------------------------------------------------------------------------------|

|            |                                                                                                                                                                                                                                                                                                             |
|------------|-------------------------------------------------------------------------------------------------------------------------------------------------------------------------------------------------------------------------------------------------------------------------------------------------------------|
| Validation | <input type="text" value="All antibodies were tested and titrated in Martinelli's laboratory for cross reactivity with macaque cells.&lt;br/&gt;All antibodies were from commercial sources (indicated in Table S4) providing on their website extensive validation data (in human and/or macaque cells)"/> |
|------------|-------------------------------------------------------------------------------------------------------------------------------------------------------------------------------------------------------------------------------------------------------------------------------------------------------------|

All antibodies were tested and titrated in Martinelli's laboratory for cross reactivity with macaque cells.  
All antibodies were from commercial sources (indicated in Table S4) providing on their website extensive validation data (in human and/or macaque cells)

Treg/Tfh Panel  
FITC FOXP3 PCH101  
EBioscience  
PCP-Cy5.5 CD4 L200 BD  
BV421 CTLA4 BNI3  
Biolegend  
BV510 L/D N/A BD  
BV605 CD95 DX2 Biolegend  
BV650 PD-1 EH12.2H7 Biolegend  
BV711 CD39 A1 Biolegend  
BUV395 CD25 BC96 BD  
BUV737 CD28 CD28.2 BD  
BUV805 CD8 RPA-T8 Biolegend  
PE-Cy5 CXCR5 C398.4A Biolegend  
PE-Cy7 CCR4 L291H4 Biolegend  
APC TCF-1 s33-966(RUO) BD  
AL700 CD3 SP34-2 BD

## Eukaryotic cell lines

Policy information about [cell lines and Sex and Gender in Research](#)

|                                                                      |                                |
|----------------------------------------------------------------------|--------------------------------|
| Cell line source(s)                                                  | <b>No cell lines were used</b> |
| Authentication                                                       |                                |
| Mycoplasma contamination                                             |                                |
| Commonly misidentified lines<br>(See <a href="#">ICLAC</a> register) |                                |

## Palaeontology and Archaeology

|                                                                                                                                                 |  |
|-------------------------------------------------------------------------------------------------------------------------------------------------|--|
| Specimen provenance                                                                                                                             |  |
| Specimen deposition                                                                                                                             |  |
| Dating methods                                                                                                                                  |  |
| <input type="checkbox"/> Tick this box to confirm that the raw and calibrated dates are available in the paper or in Supplementary Information. |  |
| Ethics oversight                                                                                                                                |  |

Note that full information on the approval of the study protocol must also be provided in the manuscript.

## Animals and other research organisms

Policy information about [studies involving animals; ARRIVE guidelines](#) recommended for reporting animal research, and [Sex and Gender in Research](#)

|                         |                                                                                                                                                                     |
|-------------------------|---------------------------------------------------------------------------------------------------------------------------------------------------------------------|
| Laboratory animals      | Indian origin rhesus macaques (Macaca Mulatta, Mamu-A01-, -B08, -B17-, all females) Age is indicated in Table S1                                                    |
| Wild animals            | No wild animals were used in the study                                                                                                                              |
| Reporting on sex        | Only female macaques were used in this study because of restricted availability.                                                                                    |
| Field-collected samples | No field-collected samples were used in the study                                                                                                                   |
| Ethics oversight        | The study was approved by the Institutional Animal Care and Usage Committees (IACUC) of the University of Louisiana at Lafayette (2021-8821-002; protocol 8821-01). |

Note that full information on the approval of the study protocol must also be provided in the manuscript.

## Clinical data

Policy information about [clinical studies](#)

All manuscripts should comply with the ICMJE [guidelines for publication of clinical research](#) and a completed [CONSORT checklist](#) must be included with all submissions.

|                             |  |
|-----------------------------|--|
| Clinical trial registration |  |
| Study protocol              |  |
| Data collection             |  |
| Outcomes                    |  |

## Dual use research of concern

Policy information about [dual use research of concern](#)

### Hazards

Could the accidental, deliberate or reckless misuse of agents or technologies generated in the work, or the application of information presented in the manuscript, pose a threat to:

- | No                                  | Yes                                                 |
|-------------------------------------|-----------------------------------------------------|
| <input checked="" type="checkbox"/> | <input type="checkbox"/> Public health              |
| <input checked="" type="checkbox"/> | <input type="checkbox"/> National security          |
| <input checked="" type="checkbox"/> | <input type="checkbox"/> Crops and/or livestock     |
| <input checked="" type="checkbox"/> | <input type="checkbox"/> Ecosystems                 |
| <input checked="" type="checkbox"/> | <input type="checkbox"/> Any other significant area |

## Experiments of concern

Does the work involve any of these experiments of concern:

- | No                                  | Yes                                                                                                  |
|-------------------------------------|------------------------------------------------------------------------------------------------------|
| <input checked="" type="checkbox"/> | <input type="checkbox"/> Demonstrate how to render a vaccine ineffective                             |
| <input checked="" type="checkbox"/> | <input type="checkbox"/> Confer resistance to therapeutically useful antibiotics or antiviral agents |
| <input checked="" type="checkbox"/> | <input type="checkbox"/> Enhance the virulence of a pathogen or render a nonpathogen virulent        |
| <input checked="" type="checkbox"/> | <input type="checkbox"/> Increase transmissibility of a pathogen                                     |
| <input checked="" type="checkbox"/> | <input type="checkbox"/> Alter the host range of a pathogen                                          |
| <input checked="" type="checkbox"/> | <input type="checkbox"/> Enable evasion of diagnostic/detection modalities                           |
| <input checked="" type="checkbox"/> | <input type="checkbox"/> Enable the weaponization of a biological agent or toxin                     |
| <input checked="" type="checkbox"/> | <input type="checkbox"/> Any other potentially harmful combination of experiments and agents         |

## Plants

|                       |                      |
|-----------------------|----------------------|
| Seed stocks           | <input type="text"/> |
| Novel plant genotypes | <input type="text"/> |
| Authentication        | <input type="text"/> |

## ChIP-seq

### Data deposition

- Confirm that both raw and final processed data have been deposited in a public database such as [GEO](#).
- Confirm that you have deposited or provided access to graph files (e.g. BED files) for the called peaks.

|                                                                    |                      |
|--------------------------------------------------------------------|----------------------|
| Data access links<br><i>May remain private before publication.</i> | <input type="text"/> |
| Files in database submission                                       | <input type="text"/> |
| Genome browser session<br>(e.g. <a href="#">UCSC</a> )             | <input type="text"/> |

### Methodology

|                         |                      |
|-------------------------|----------------------|
| Replicates              | <input type="text"/> |
| Sequencing depth        | <input type="text"/> |
| Antibodies              | <input type="text"/> |
| Peak calling parameters | <input type="text"/> |
| Data quality            | <input type="text"/> |

Software

## Flow Cytometry

### Plots

Confirm that:

- The axis labels state the marker and fluorochrome used (e.g. CD4-FITC).
- The axis scales are clearly visible. Include numbers along axes only for bottom left plot of group (a 'group' is an analysis of identical markers).
- All plots are contour plots with outliers or pseudocolor plots.
- A numerical value for number of cells or percentage (with statistics) is provided.

### Methodology

Sample preparation

Instrument

Software

Cell population abundance

Gating strategy

- Tick this box to confirm that a figure exemplifying the gating strategy is provided in the Supplementary Information.

## Magnetic resonance imaging

### Experimental design

Design type

Design specifications

Behavioral performance measures

Imaging type(s)

Field strength

Sequence &amp; imaging parameters

Area of acquisition

Diffusion MRI

 Used Not used

### Preprocessing

Preprocessing software

Normalization

Normalization template

Noise and artifact removal

Volume censoring

### Statistical modeling & inference

Model type and settings

Effect(s) tested

Specify type of analysis:  Whole brain  ROI-based  Both

Statistic type for inference

(See [Eklund et al. 2016](#))

Correction

## Models & analysis

n/a | Involved in the study

  Functional and/or effective connectivity  Graph analysis  Multivariate modeling or predictive analysis

Functional and/or effective connectivity

Graph analysis

Multivariate modeling and predictive analysis

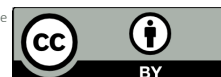

Supplement: 41467_2024_45555_MOESM17_ESM.pdf [file 41467_2024_45555_MOESM17_ESM.pdf]
